# Supplementary material for: Increasing the performance, trustworthiness and practical value of machine learning models: a case study predicting hydrogen bond network dimensionalities from molecular diagrams
Source: Royal Society of Chemistry journal article supplement (doi:10.1039/d0ce00111b), 2020-01-01
Supplement: d0ce00111b1.pdf [file d0ce00111b1.pdf]

**Increasing the performance, trustworthiness and practical value of machine learning models: a case study predicting hydrogen bond network dimensionalities from molecular diagrams**

**Supplementary Information**

A. List of molecular descriptors calculated using RDKit package. Marked in bold are the two descriptors that were discarded during the data pre-processing stage, because their values were constant across all dataset examples.

|                          |                 |                  |
|--------------------------|-----------------|------------------|
| MolWt                    | SMR_VSA10       | Chi2v            |
| ExactMolWt               | SMR_VSA2        | Chi3n            |
| HeavyAtomMolWt           | SMR_VSA3        | Chi3v            |
| NumHAcceptors            | SMR_VSA4        | Chi4n            |
| NumHDonors               | SMR_VSA5        | Chi4v            |
| NumRotatableBonds        | SMR_VSA6        | HallKierAlpha    |
| FractionCSP3             | SMR_VSA7        | Kappa1           |
| NHOHCount                | <b>SMR_VSA8</b> | Kappa2           |
| NOCCount                 | <b>SMR_VSA9</b> | Kappa3           |
| NumHeteroatoms           | SlogP_VSA1      | BertzCT          |
| HeavyAtomCount           | SlogP_VSA10     | TPSA             |
| NumAliphaticCarbocycles  | SlogP_VSA11     | Ipc              |
| NumAromaticCarbocycles   | SlogP_VSA12     | FpDensityMorgan1 |
| NumSaturatedCarbocycles  | SlogP_VSA2      | FpDensityMorgan2 |
| NumAliphaticHeterocycles | SlogP_VSA3      | FpDensityMorgan3 |
| NumAromaticHeterocycles  | SlogP_VSA4      |                  |
| NumSaturatedHeterocycles | SlogP_VSA5      |                  |
| RingCount                | SlogP_VSA6      |                  |
| NumAliphaticRings        | SlogP_VSA7      |                  |
| NumAromaticRings         | SlogP_VSA8      |                  |
| NumSaturatedRings        | SlogP_VSA9      |                  |
| NumValenceElectrons      | EState_VSA1     |                  |
| NumRadicalElectrons      | EState_VSA2     |                  |
| qed                      | EState_VSA3     |                  |
| MolLogP                  | EState_VSA4     |                  |
| MolMR                    | EState_VSA5     |                  |
| BalabanJ                 | EState_VSA6     |                  |
| MaxAbsPartialCharge      | EState_VSA7     |                  |
| MinAbsPartialCharge      | EState_VSA8     |                  |
| MaxPartialCharge         | EState_VSA9     |                  |
| MinPartialCharge         | EState_VSA10    |                  |
| MaxAbsEStateIndex        | EState_VSA11    |                  |
| MinAbsEStateIndex        | VSA_EState1     |                  |
| MaxEStateIndex           | VSA_EState2     |                  |
| MinEStateIndex           | VSA_EState3     |                  |
| PEOE_VSA1                | VSA_EState4     |                  |
| PEOE_VSA10               | VSA_EState5     |                  |
| PEOE_VSA11               | VSA_EState6     |                  |
| PEOE_VSA12               | VSA_EState7     |                  |
| PEOE_VSA13               | VSA_EState8     |                  |
| PEOE_VSA14               | VSA_EState9     |                  |
| PEOE_VSA2                | VSA_EState10    |                  |
| PEOE_VSA3                | LabuteASA       |                  |
| PEOE_VSA4                | Chi0            |                  |
| PEOE_VSA5                | Chi0n           |                  |
| PEOE_VSA6                | Chi0v           |                  |
| PEOE_VSA7                | Chi1            |                  |
| PEOE_VSA8                | Chi1n           |                  |
| PEOE_VSA9                | Chi1v           |                  |
| SMR_VSA1                 | Chi2n           |                  |

B. Statistical methods considered for model generation, along with optimised parameters and mean 5-fold cross validation accuracy.

| <b>Method</b>                            | <b>Optimal Parameters</b>                            | <b>Accuracy</b> |
|------------------------------------------|------------------------------------------------------|-----------------|
| <b>Random Forest</b>                     | max_depth: 30, n_estimators: 100                     | 0.57            |
| <b>SVM Linear kernel</b>                 | C: 50                                                | 0.57            |
| <b>SVM RBF kernel</b>                    | C: 50, gamma: 0.001                                  | 0.58            |
| <b>SVM Sigmoid kernel</b>                | gamma: 0.001                                         | 0.53            |
| <b>Logistic Regression (one vs rest)</b> | C: 200                                               | 0.54            |
| <b>Logistic Regression multinomial</b>   | C: 100                                               | 0.56            |
| <b>K Nearest Neighbours</b>              | n_neighbors: 50                                      | 0.51            |
| <b>Gaussian Naive Bayes</b>              | var_smoothing: 0.01                                  | 0.43            |
| <b>Gaussian Process (one vs rest)</b>    | random_state: 0                                      | 0.47            |
| <b>Gradient Boosting Classifier</b>      | learning_rate: 0.1, max_depth: 10, n_estimators: 100 | 0.57            |
